# Supplementary material for: Modulating Gastrointestinal Microbiota in Preweaning Dairy Calves: Dose-Dependent Effects of Milk-Based Sodium Butyrate Supplementation
Source: MDPI journal article supplement (doi:10.3390/microorganisms12020333), 2024-02-05
Supplement: s1 [file s1]

*Article*

# **Modulating Gastrointestinal Microbiota in Prewaning Dairy Calves: Dose-Dependent Effects of Milk-Based Sodium Butyrate Supplementation**

**Donglin Wu <sup>1</sup>, Zhanhe Zhang <sup>1</sup>, Qifan Song <sup>1</sup>, Yang Jia <sup>1,2</sup>, Jingwei Qi <sup>1,2</sup>, and Ming Xu <sup>1,2,\*</sup>**

<sup>1</sup> College of Animal Science, Inner Mongolia Agricultural University, Hohhot 010018, China; wdl2017@emails.imau.edu.cn (D.W.); nddky@emails.imau.edu.cn (Z.Z.); jiayang@imau.edu.cn (Y.J.)

<sup>2</sup> National Center of Technology Innovation for Dairy, Hohhot, Inner Mongolia 010080, China

\* Correspondence: ndxm@imau.edu.cn;

Tel.: +86-1362-4710-492; Fax: +86-471-4309-170

Supplementary material – Tables and Figures

**Supplemental Table S1.** Information on the sequencing depth of 16S rRNA genes in ruminal microbiota.

| Sample ID | Total read bases<br>(bp) | Clean<br>reads | Mean_length | Min_length | Max_length | Goods<br>-coverage |
|-----------|--------------------------|----------------|-------------|------------|------------|--------------------|
| CON1      | 16256853                 | 39095          | 415.829467  | 233        | 478        | 0.998637           |
| CON2      | 16044873                 | 38735          | 414.221583  | 216        | 462        | 0.999215           |
| CON3      | 21570013                 | 51994          | 414.85581   | 217        | 465        | 0.999009           |
| CON4      | 20431997                 | 48788          | 418.791445  | 210        | 469        | 0.998679           |
| CON5      | 25350461                 | 60844          | 416.646851  | 234        | 432        | 0.998926           |
| CON6      | 18224940                 | 43841          | 415.70539   | 216        | 518        | 0.998803           |
| CON7      | 17619410                 | 42338          | 416.160659  | 204        | 434        | 0.998637           |
| CON8      | 19853293                 | 48220          | 411.723206  | 219        | 465        | 0.99872            |
| CON9      | 24377464                 | 58619          | 415.862843  | 214        | 480        | 0.998968           |
| CON10     | 20263955                 | 48736          | 415.790278  | 210        | 469        | 0.998968           |
| LSB1      | 17991816                 | 43356          | 414.978688  | 265        | 496        | 0.998596           |
| LSB2      | 19864574                 | 47626          | 417.095158  | 216        | 531        | 0.998514           |
| LSB3      | 19120315                 | 45832          | 417.182645  | 252        | 528        | 0.999009           |
| LSB4      | 22767759                 | 54946          | 414.366087  | 219        | 489        | 0.998803           |
| LSB5      | 26920641                 | 64834          | 415.224126  | 235        | 436        | 0.999009           |
| LSB6      | 24281196                 | 58193          | 417.252865  | 250        | 437        | 0.998596           |
| LSB7      | 17411582                 | 41998          | 414.581218  | 248        | 481        | 0.999174           |
| LSB8      | 22639823                 | 54046          | 418.899141  | 235        | 438        | 0.998514           |
| LSB9      | 24560953                 | 58726          | 418.229626  | 201        | 434        | 0.998803           |
| LSB10     | 18878391                 | 45372          | 416.080204  | 230        | 469        | 0.998844           |
| MSB1      | 14158134                 | 34022          | 416.146435  | 278        | 473        | 0.998761           |
| MSB2      | 23554526                 | 57096          | 412.54249   | 219        | 474        | 0.998472           |
| MSB3      | 21820955                 | 52726          | 413.855688  | 251        | 476        | 0.998761           |
| MSB4      | 16272903                 | 39244          | 414.659642  | 219        | 455        | 0.998348           |
| MSB5      | 26108834                 | 62958          | 414.702405  | 205        | 498        | 0.998926           |
| MSB6      | 15460972                 | 37456          | 412.776912  | 227        | 471        | 0.999257           |
| MSB7      | 19741962                 | 47509          | 415.541518  | 233        | 505        | 0.999009           |
| MSB8      | 29258255                 | 70139          | 417.146737  | 210        | 471        | 0.998926           |
| MSB9      | 29453352                 | 71027          | 414.678249  | 219        | 491        | 0.999298           |
| MSB10     | 18237598                 | 44001          | 414.481444  | 232        | 511        | 0.998844           |
| HSB1      | 17692281                 | 42679          | 414.543007  | 219        | 431        | 0.999174           |
| HSB2      | 25383842                 | 61090          | 415.515502  | 201        | 484        | 0.998844           |
| HSB3      | 26529525                 | 63760          | 416.084144  | 222        | 472        | 0.999092           |
| HSB4      | 17628910                 | 42704          | 412.816364  | 263        | 452        | 0.998885           |
| HSB5      | 21695051                 | 52180          | 415.773304  | 232        | 431        | 0.999009           |
| HSB6      | 21402007                 | 51251          | 417.591988  | 205        | 513        | 0.998968           |
| HSB7      | 27136051                 | 64891          | 418.178962  | 213        | 431        | 0.999009           |
| HSB8      | 31163496                 | 74227          | 419.840435  | 232        | 493        | 0.999215           |
| HSB9      | 23928558                 | 57637          | 415.159672  | 216        | 518        | 0.998968           |
| HSB10     | 23218823                 | 55744          | 416.525958  | 213        | 463        | 0.998968           |
| Summation |                          | 2078480        |             |            |            |                    |
| Average   | 21606908.6               | 51962          | 415.7009537 | 225.825    | 473.1      | 0.99887895         |

CON represents the control group, which received milk without sodium butyrate (SB) supplementation. LSB refers to the low SB supplementation group, MSB refers to the medium SB supplementation group, and HSB refers to the high SB supplementation group.

**Supplemental Table S2.** Effects of sodium butyrate supplementation on taxonomic analysis (> 0.1%) of ruminal microbiota at the phylum and genus levels in preweaning calves.

| Items                         | Supplementation level, g/d |                    |                    |                   | SEM   | p-Value |        |           |
|-------------------------------|----------------------------|--------------------|--------------------|-------------------|-------|---------|--------|-----------|
|                               | 0                          | 4.4                | 8.8                | 17.6              |       | ANOVA   | Linear | Quadratic |
| Phylum level                  |                            |                    |                    |                   |       |         |        |           |
| Firmicutes                    | 46.92                      | 45.49              | 50.67              | 46.97             | 1.83  | 0.777   | 0.845  | 0.600     |
| Bacteroidota                  | 27.42                      | 32.26              | 26.36              | 36.72             | 1.93  | 0.209   | 0.137  | 0.452     |
| Actinobacteriota              | 21.89                      | 15.18              | 19.30              | 11.19             | 1.69  | 0.117   | 0.047  | 0.884     |
| Spirochaetota                 | 1.20                       | 2.29               | 0.44               | 1.65              | 0.345 | 0.291   | 0.998  | 0.642     |
| Synergistota                  | 0.891                      | 1.50               | 0.848              | 1.04              | 0.211 | 0.694   | 0.913  | 0.799     |
| Patescibacteria               | 0.537                      | 0.813              | 1.31               | 1.17              | 0.254 | 0.718   | 0.365  | 0.529     |
| Proteobacteria                | 0.472                      | 0.544              | 0.500              | 0.619             | 0.122 | 0.979   | 0.709  | 0.945     |
| Desulfobacterota              | 0.440                      | 0.493              | 0.399              | 0.512             | 0.049 | 0.858   | 0.714  | 0.710     |
| Genus level                   |                            |                    |                    |                   |       |         |        |           |
| Firmicutes phylum             |                            |                    |                    |                   |       |         |        |           |
| Succiniclasicum               | 5.08                       | 6.19               | 7.58               | 4.86              | 0.643 | 0.434   | 0.857  | 0.119     |
| Shuttleworthia                | 3.27                       | 2.81               | 3.93               | 4.41              | 0.682 | 0.858   | 0.464  | 0.896     |
| Lachnospiraceae_NK3A20_group  | 3.81                       | 3.27               | 3.27               | 3.79              | 0.328 | 0.895   | 0.914  | 0.456     |
| Acetitomaculum                | 3.86                       | 2.30               | 3.97               | 3.22              | 0.475 | 0.596   | 0.937  | 0.858     |
| Sharpea                       | 3.22                       | 2.01               | 0.98               | 2.92              | 0.387 | 0.164   | 0.883  | 0.029     |
| Syntrophococcus               | 2.16                       | 1.77               | 2.06               | 1.46              | 0.155 | 0.393   | 0.163  | 0.776     |
| Erysipelotrichaceae_UCG-002   | 2.29                       | 1.66               | 0.89               | 0.42              | 0.459 | 0.501   | 0.143  | 0.704     |
| Ruminococcus_gauvreauii_group | 1.30                       | 2.60               | 1.21               | 0.69              | 0.263 | 0.061   | 0.117  | 0.230     |
| NK4A214_group                 | 1.50                       | 1.15               | 1.27               | 1.48              | 0.162 | 0.861   | 0.869  | 0.460     |
| Eubacterium_nodatum_group     | 1.38                       | 1.32               | 1.49               | 1.07              | 0.125 | 0.705   | 0.424  | 0.494     |
| Ruminococcus                  | 0.759                      | 0.864              | 0.864              | 1.16              | 0.188 | 0.900   | 0.469  | 0.880     |
| Christensenellaceae_R-7_group | 0.605                      | 0.494              | 1.42               | 0.533             | 0.263 | 0.572   | 0.938  | 0.340     |
| Oscillospiraceae_UCG-002      | 0.259 <sup>b</sup>         | 0.552 <sup>b</sup> | 0.432 <sup>b</sup> | 1.80 <sup>a</sup> | 0.210 | 0.031   | 0.007  | 0.291     |
| Oribacterium                  | 0.502                      | 0.837              | 0.642              | 0.600             | 0.128 | 0.835   | 0.995  | 0.551     |

|                              |       |       |       |       |       |       |       |       |
|------------------------------|-------|-------|-------|-------|-------|-------|-------|-------|
| Coprococcus                  | 0.399 | 0.386 | 0.519 | 0.476 | 0.061 | 0.854 | 0.564 | 0.739 |
| Acidaminococcus              | 0.655 | 0.340 | 0.624 | 0.134 | 0.099 | 0.197 | 0.107 | 0.650 |
| Roseburia                    | 0.335 | 0.429 | 0.324 | 0.611 | 0.085 | 0.627 | 0.293 | 0.614 |
| Lachnospiraceae_FE2018_group | 0.509 | 0.316 | 0.218 | 0.332 | 0.045 | 0.144 | 0.214 | 0.049 |
| Pseudoramibacter             | 0.347 | 0.255 | 0.230 | 0.161 | 0.026 | 0.075 | 0.012 | 0.538 |
| Lachnoclostridium            | 0.233 | 0.206 | 0.202 | 0.246 | 0.026 | 0.929 | 0.797 | 0.539 |
| Moryella                     | 0.232 | 0.178 | 0.193 | 0.191 | 0.020 | 0.803 | 0.604 | 0.528 |
| Catenisphaera                | 0.272 | 0.199 | 0.109 | 0.186 | 0.028 | 0.239 | 0.275 | 0.098 |
| Erysipelotrichaceae_UCG-006  | 0.225 | 0.117 | 0.113 | 0.144 | 0.020 | 0.183 | 0.283 | 0.069 |
| Mogibacterium                | 0.113 | 0.143 | 0.137 | 0.134 | 0.012 | 0.842 | 0.679 | 0.503 |
| Solobacterium                | 0.116 | 0.108 | 0.181 | 0.105 | 0.027 | 0.729 | 0.987 | 0.429 |
| Bacteroidota phylum          |       |       |       |       |       |       |       |       |
| Prevotella                   | 20.18 | 22.00 | 17.76 | 29.70 | 1.88  | 0.127 | 0.078 | 0.192 |
| Rikenellaceae_RC9_gut_group  | 2.08  | 3.39  | 2.72  | 0.999 | 0.438 | 0.262 | 0.211 | 0.149 |
| Prevotellaceae_UCG-001       | 0.318 | 0.539 | 0.697 | 0.630 | 0.119 | 0.709 | 0.385 | 0.438 |
| Prevotellaceae_YAB2003_group | 0.180 | 0.278 | 0.137 | 0.142 | 0.047 | 0.713 | 0.558 | 0.841 |
| Actinobacteriota phylum      |       |       |       |       |       |       |       |       |
| Olsenella                    | 19.83 | 13.31 | 17.54 | 10.14 | 1.62  | 0.149 | 0.068 | 0.918 |
| Atopobium                    | 0.580 | 0.701 | 0.913 | 0.152 | 0.225 | 0.691 | 0.479 | 0.359 |
| Bifidobacterium              | 0.754 | 0.446 | 0.458 | 0.407 | 0.108 | 0.666 | 0.344 | 0.500 |
| Spirochaetota phylum         |       |       |       |       |       |       |       |       |
| Treponema                    | 0.871 | 1.95  | 0.216 | 1.19  | 0.337 | 0.341 | 0.895 | 0.764 |
| Sphaerochaeta                | 0.334 | 0.344 | 0.228 | 0.464 | 0.050 | 0.432 | 0.389 | 0.246 |
| Synergistota phylum          |       |       |       |       |       |       |       |       |
| Pyramidobacter               | 0.341 | 0.495 | 0.346 | 0.295 | 0.086 | 0.869 | 0.682 | 0.691 |
| Desulfobacterota phylum      |       |       |       |       |       |       |       |       |
| Desulfovibrio                | 0.437 | 0.484 | 0.391 | 0.501 | 0.049 | 0.870 | 0.747 | 0.696 |

SEM = standard error of the means;  $n = 10$  for each group; Means are significantly different with  $p < 0.05$ .

**Supplemental Table S3.** Information on the sequencing depth of 16S rRNA genes in intestinal microbiota.

| Sample ID | Total read bases<br>(bp) | Clean<br>reads | Mean_length | Min_length | Max_length | Goods<br>-coverage |
|-----------|--------------------------|----------------|-------------|------------|------------|--------------------|
| CON1      | 21266760                 | 51032          | 416.733814  | 337        | 431        | 0.997651           |
| CON2      | 23884539                 | 57457          | 415.694154  | 307        | 431        | 0.996434           |
| CON3      | 20907343                 | 50672          | 412.601496  | 245        | 503        | 0.995218           |
| CON4      | 20185857                 | 48651          | 414.911451  | 270        | 431        | 0.996728           |
| CON5      | 14884604                 | 35841          | 415.295444  | 277        | 472        | 0.995973           |
| CON6      | 20111360                 | 48904          | 411.241616  | 284        | 432        | 0.996141           |
| CON7      | 22469061                 | 53834          | 417.376769  | 246        | 438        | 0.995511           |
| CON8      | 20497535                 | 49731          | 412.168165  | 270        | 430        | 0.99677            |
| CON9      | 20664942                 | 49537          | 417.161758  | 216        | 432        | 0.995889           |
| CON10     | 20822587                 | 49764          | 418.426714  | 270        | 468        | 0.995008           |
| LSB1      | 17911722                 | 41921          | 427.273252  | 270        | 431        | 0.998448           |
| LSB2      | 25752344                 | 62127          | 414.511307  | 216        | 431        | 0.996225           |
| LSB3      | 22602244                 | 54143          | 417.454592  | 216        | 431        | 0.995595           |
| LSB4      | 19660791                 | 47482          | 414.0683    | 218        | 491        | 0.995973           |
| LSB5      | 21188240                 | 51152          | 414.221145  | 271        | 446        | 0.99677            |
| LSB6      | 21047564                 | 50782          | 414.468985  | 215        | 493        | 0.996308           |
| LSB7      | 20349611                 | 48701          | 417.847909  | 232        | 471        | 0.996728           |
| LSB8      | 22249705                 | 53423          | 416.481759  | 287        | 494        | 0.994882           |
| LSB9      | 18910275                 | 46156          | 409.703506  | 267        | 472        | 0.99635            |
| LSB10     | 21625147                 | 51833          | 417.208091  | 270        | 511        | 0.995302           |
| MSB1      | 20026723                 | 48438          | 413.450659  | 216        | 432        | 0.995973           |
| MSB2      | 23763479                 | 57398          | 414.012318  | 216        | 458        | 0.995931           |
| MSB3      | 18648569                 | 45160          | 412.944398  | 216        | 432        | 0.996434           |
| MSB4      | 20285953                 | 48945          | 414.464256  | 255        | 431        | 0.995469           |
| MSB5      | 20561792                 | 49670          | 413.968029  | 249        | 509        | 0.995763           |
| MSB6      | 21914346                 | 52651          | 416.218989  | 214        | 431        | 0.996476           |
| MSB7      | 19884165                 | 47752          | 416.404863  | 292        | 493        | 0.995427           |
| MSB8      | 19554053                 | 47162          | 414.614584  | 221        | 432        | 0.997399           |
| MSB9      | 21647865                 | 51865          | 417.388701  | 252        | 497        | 0.995553           |
| MSB10     | 17645922                 | 42342          | 416.747485  | 215        | 467        | 0.996518           |
| HSB1      | 23922184                 | 57520          | 415.893324  | 235        | 465        | 0.995763           |
| HSB2      | 19765261                 | 48012          | 411.673352  | 252        | 432        | 0.997231           |
| HSB3      | 17982247                 | 43246          | 415.812954  | 219        | 441        | 0.997231           |
| HSB4      | 17960105                 | 43040          | 417.288685  | 271        | 431        | 0.995427           |
| HSB5      | 21841288                 | 52801          | 413.652923  | 248        | 443        | 0.995889           |
| HSB6      | 19829928                 | 47515          | 417.340377  | 271        | 499        | 0.997357           |
| HSB7      | 20437373                 | 48747          | 419.253964  | 210        | 438        | 0.996812           |
| HSB8      | 20120400                 | 48488          | 414.956278  | 230        | 509        | 0.996896           |
| HSB9      | 20721154                 | 50277          | 412.139825  | 317        | 489        | 0.995931           |
| HSB10     | 19544254                 | 46836          | 417.291272  | 252        | 485        | 0.996686           |
| Summation |                          | 1981008        |             |            |            |                    |
| Average   | 20576232.3               | 49525.2        | 415.5091866 | 250.875    | 458.825    | 0.99625175         |

CON represents the control group, which received milk without sodium butyrate (SB) supplementation. LSB refers to the low SB supplementation group, MSB refers to the

medium SB supplementation group, and HSB refers to the high SB supplementation group.

**Supplemental Table S4.** Effects of sodium butyrate supplementation on taxonomic analysis (> 0.1%) of intestinal microbiota at the phylum and genus levels in preweaning calves.

| Items                       | Supplementation level, g/d |                   |                   |                    | SEM   | <i>p</i> -Value |        |           |
|-----------------------------|----------------------------|-------------------|-------------------|--------------------|-------|-----------------|--------|-----------|
|                             | 0                          | 4.4               | 8.8               | 17.6               |       | ANOVA           | Linear | Quadratic |
| Phylum level                |                            |                   |                   |                    |       |                 |        |           |
| Firmicutes                  | 61.02                      | 63.21             | 54.19             | 53.11              | 1.89  | 0.156           | 0.059  | 0.890     |
| Bacteroidota                | 35.32                      | 29.42             | 38.28             | 39.99              | 2.03  | 0.277           | 0.195  | 0.643     |
| Actinobacteriota            | 1.70                       | 3.15              | 3.90              | 2.85               | 0.648 | 0.701           | 0.604  | 0.290     |
| Proteobacteria              | 0.655                      | 3.200             | 0.810             | 0.834              | 0.413 | 0.083           | 0.531  | 0.287     |
| Patescibacteria             | 0.141                      | 0.133             | 1.39              | 2.61               | 0.505 | 0.253           | 0.054  | 0.848     |
| Spirochaetota               | 0.523                      | 0.413             | 0.649             | 0.267              | 0.127 | 0.760           | 0.551  | 0.570     |
| Cyanobacteria               | 0.106                      | 0.118             | 0.523             | 0.228              | 0.097 | 0.400           | 0.522  | 0.254     |
| Genus level                 |                            |                   |                   |                    |       |                 |        |           |
| Bacteroidota phylum         |                            |                   |                   |                    |       |                 |        |           |
| Bacteroides                 | 13.00                      | 7.63              | 5.66              | 12.62              | 1.41  | 0.169           | 0.871  | 0.027     |
| Rikenellaceae_RC9_gut_group | 4.16 <sup>ab</sup>         | 3.26 <sup>b</sup> | 7.41 <sup>a</sup> | 7.29 <sup>a</sup>  | 0.670 | 0.048           | 0.027  | 0.666     |
| Alloprevotella              | 1.90                       | 3.12              | 2.98              | 4.06               | 0.580 | 0.641           | 0.234  | 0.850     |
| Parabacteroides             | 3.02                       | 2.15              | 3.48              | 3.23               | 0.385 | 0.656           | 0.599  | 0.934     |
| Odoribacter                 | 1.24                       | 0.91              | 1.27              | 2.41               | 0.238 | 0.121           | 0.039  | 0.224     |
| Prevotellaceae_NK3B31_group | 1.88                       | 1.25              | 0.64              | 1.81               | 0.370 | 0.624           | 1.000  | 0.201     |
| Prevotella                  | 1.12                       | 0.716             | 0.961             | 0.617              | 0.191 | 0.792           | 0.455  | 0.936     |
| Alistipes                   | 0.293                      | 0.292             | 0.412             | 0.628              | 0.089 | 0.517           | 0.149  | 0.746     |
| Prevotellaceae_UCG-003      | 0.417                      | 0.288             | 0.242             | 0.305              | 0.067 | 0.834           | 0.629  | 0.435     |
| Butyricimonas               | 0.158                      | 0.194             | 0.221             | 0.430              | 0.059 | 0.378           | 0.095  | 0.635     |
| Firmicutes phylum           |                            |                   |                   |                    |       |                 |        |           |
| Lactobacillus               | 9.96                       | 11.44             | 6.96              | 5.41               | 1.26  | 0.317           | 0.109  | 0.881     |
| UCG-005                     | 6.20                       | 9.83              | 7.87              | 7.77               | 1.09  | 0.719           | 0.854  | 0.472     |
| Blautia                     | 6.04                       | 6.31              | 4.65              | 4.95               | 0.545 | 0.663           | 0.368  | 0.742     |
| Faecalibacterium            | 5.22 <sup>a</sup>          | 2.30 <sup>b</sup> | 3.36 <sup>b</sup> | 4.79 <sup>ab</sup> | 0.415 | 0.043           | 0.741  | 0.015     |



|                               |       |       |       |       |       |       |       |       |
|-------------------------------|-------|-------|-------|-------|-------|-------|-------|-------|
| Christensenellaceae_R-7_group | 1.85  | 2.11  | 2.34  | 2.13  | 0.365 | 0.975 | 0.804 | 0.708 |
| Lachnoclostridium             | 1.67  | 1.48  | 1.52  | 1.42  | 0.141 | 0.938 | 0.598 | 0.846 |
| Ruminococcus                  | 1.17  | 0.461 | 1.87  | 0.729 | 0.296 | 0.368 | 0.873 | 0.501 |
| Ruminococcus_torques_group    | 1.03  | 0.801 | 0.941 | 1.01  | 0.142 | 0.944 | 0.906 | 0.675 |
| Phascolarctobacterium         | 0.572 | 1.35  | 0.495 | 1.10  | 0.230 | 0.501 | 0.675 | 0.983 |
| Subdoligranulum               | 0.520 | 1.02  | 0.643 | 0.485 | 0.176 | 0.706 | 0.692 | 0.482 |
| Ruminococcus_gauvreauii_group | 0.559 | 0.567 | 0.555 | 0.435 | 0.096 | 0.961 | 0.634 | 0.804 |
| Romboutsia                    | 0.745 | 0.397 | 0.642 | 0.298 | 0.141 | 0.669 | 0.371 | 0.994 |
| Butyricicoccus                | 0.449 | 0.256 | 0.101 | 0.316 | 0.063 | 0.277 | 0.519 | 0.070 |
| Monoglobus                    | 0.395 | 0.226 | 0.209 | 0.170 | 0.036 | 0.131 | 0.048 | 0.243 |
| Lachnospiraceae_NK4A136_group | 0.243 | 0.425 | 0.227 | 0.098 | 0.084 | 0.603 | 0.359 | 0.533 |
| Negativibacillus              | 0.211 | 0.349 | 0.133 | 0.234 | 0.039 | 0.267 | 0.757 | 0.847 |
| Marvinbryantia                | 0.222 | 0.243 | 0.145 | 0.307 | 0.055 | 0.793 | 0.645 | 0.502 |
| Fournierella                  | 0.250 | 0.315 | 0.121 | 0.137 | 0.030 | 0.059 | 0.052 | 0.773 |
| NK4A214_group                 | 0.184 | 0.205 | 0.294 | 0.139 | 0.051 | 0.767 | 0.777 | 0.369 |
| Oscillospira                  | 0.246 | 0.250 | 0.120 | 0.201 | 0.042 | 0.687 | 0.595 | 0.475 |
| Colidextribacter              | 0.300 | 0.186 | 0.133 | 0.193 | 0.036 | 0.426 | 0.356 | 0.168 |
| Erysipelatoclostridium        | 0.211 | 0.183 | 0.162 | 0.105 | 0.037 | 0.794 | 0.317 | 0.973 |
| Eubacterium_nodatum_group     | 0.296 | 0.169 | 0.129 | 0.056 | 0.044 | 0.280 | 0.067 | 0.557 |
| Actinobacteriota phylum       |       |       |       |       |       |       |       |       |
| Collinsella                   | 0.885 | 2.154 | 1.947 | 2.172 | 0.541 | 0.823 | 0.506 | 0.608 |
| Bifidobacterium               | 0.206 | 0.086 | 0.991 | 0.182 | 0.227 | 0.480 | 0.865 | 0.304 |
| Olsenella                     | 0.408 | 0.370 | 0.432 | 0.191 | 0.058 | 0.467 | 0.198 | 0.445 |
| Proteobacteria phylum         |       |       |       |       |       |       |       |       |
| Sutterella                    | 0.476 | 0.294 | 0.253 | 0.591 | 0.091 | 0.536 | 0.538 | 0.185 |
| Escherichia-Shigella          | 0.150 | 0.812 | 0.505 | 0.063 | 0.153 | 0.289 | 0.504 | 0.123 |
| Spirochaetota phylum          |       |       |       |       |       |       |       |       |
| Treponema                     | 0.485 | 0.357 | 0.359 | 0.232 | 0.112 | 0.896 | 0.466 | 0.931 |

SEM = standard error of the means;  $n = 10$  for each group; Means are significantly different with  $p < 0.05$ .

**Supplemental Table S5.** Detailed information on the relationship between ruminal microbiota and intestinal microbiota.

| r             | ISobs | IShannon | ISimpson | IAce  | IChao1 | IShannoneven | ISimpson even | IPd   | p-Value      | ISobs  | IShannon | ISimpson | IAce   | IChao1 | IShannoneven | ISimpson even | IPd    |
|---------------|-------|----------|----------|-------|--------|--------------|---------------|-------|--------------|--------|----------|----------|--------|--------|--------------|---------------|--------|
| CON           |       |          |          |       |        |              |               |       |              |        |          |          |        |        |              |               |        |
| RSobs         | -     |          |          | -     |        |              |               | -     |              | 0.0838 | 0.2432   | 0.3877   | 0.1919 | 0.0855 | 0.3854       | 0.9586        | 0.0698 |
| RShannon      | 0.572 | -0.407   | 0.307    | 0.450 | -0.570 | -0.309       | 0.019         | 0.595 | RSobs        | 0.7509 | 0.5840   | 0.4175   | 0.5792 | 0.7110 | 0.5264       | 0.4407        | 0.7157 |
| RSimpson      | -     |          |          | -     |        |              |               | -     |              | 0.5955 | 0.5969   | 0.4811   | 0.3930 | 0.4834 | 0.6164       | 0.6614        | 0.5405 |
| RAce          | 0.192 | -0.191   | 0.253    | 0.304 | -0.251 | -0.181       | -0.159        | 0.220 | RSimpson     | 0.3208 | 0.4748   | 0.5916   | 0.5068 | 0.3079 | 0.5973       | 0.6547        | 0.2220 |
| RChao1        | -     |          |          | -     |        |              |               | -     |              | 0.1226 | 0.2680   | 0.4233   | 0.1909 | 0.0962 | 0.3890       | 0.7757        | 0.1074 |
| RShannoneven  | 0.521 | -0.388   | 0.286    | 0.451 | -0.555 | -0.307       | 0.104         | 0.540 | RChao1       | 0.3870 | 0.3266   | 0.2280   | 0.2955 | 0.3477 | 0.3228       | 0.4007        | 0.3441 |
| RSimpson even | 0.308 | 0.347    | -0.419   | 0.368 | 0.333  | 0.349        | 0.299         | 0.536 | RShannoneven | 0.1462 | 0.1448   | 0.1083   | 0.0865 | 0.1040 | 0.1645       | 0.3300        | 0.1105 |
| RPd           | -     |          |          | -     |        |              |               | -     |              | 0.0442 | 0.1431   | 0.2681   | 0.1263 | 0.0585 | 0.2475       | 0.9603        | 0.0426 |
| LSB           |       |          |          |       |        |              |               |       |              |        |          |          |        |        |              |               |        |
| RSobs         | 0.645 | -0.498   | 0.388    | 0.517 | -0.615 | -0.404       | -0.018        | 0.648 | RPd          | 0.9533 | 0.8880   | 0.8402   | 0.8672 | 0.8232 | 0.8013       | 0.5976        | 0.8904 |
| RShannon      | 0.021 | -0.051   | 0.073    | 0.061 | 0.081  | -0.092       | -0.191        | 0.050 | RSobs        | 0.004  | 0.0031   | 0.0028   | 0.007  | 0.0055 | 0.0068       | 0.4084        | 0.003  |

|             |      |        |        |      |        |        |        |      |             |       |        |        |       |        |        |       |
|-------------|------|--------|--------|------|--------|--------|--------|------|-------------|-------|--------|--------|-------|--------|--------|-------|
|             | 6    |        |        | 6    |        |        |        | 8    |             | 9     |        |        | 0     |        |        | 1     |
|             | -    |        |        | -    |        |        |        | -    |             |       |        |        |       |        |        |       |
| RSimpson    | 0.81 | -0.895 | 0.925  | 0.76 | -0.778 | -0.877 | -0.408 | 0.82 | RSimpson    | 0.004 | 0.0005 | 0.0001 | 0.009 | 0.0080 | 0.0009 | 0.003 |
|             | 2    |        |        | 8    |        |        |        | 2    |             | 3     |        |        | 4     |        |        | 5     |
| RAce        | 0.32 | 0.214  | -0.140 | 0.40 | 0.421  | 0.157  | 0.031  | 0.30 | RAce        | 0.362 | 0.5533 | 0.6990 | 0.248 | 0.2254 | 0.6639 | 0.391 |
|             | 3    |        |        | 2    |        |        |        | 5    |             | 2     |        |        | 9     |        |        | 7     |
| RChao1      | 0.16 | 0.063  | -0.018 | 0.22 | 0.249  | 0.013  | -0.110 | 0.17 | RChao1      | 0.656 | 0.8633 | 0.9615 | 0.529 | 0.4880 | 0.9709 | 0.632 |
|             | 1    |        |        | 7    |        |        |        | 3    |             | 3     |        |        | 1     |        |        | 2     |
| RShannonev  | 0.86 | 0.916  | -0.929 | 0.83 | 0.837  | 0.886  | 0.382  | 0.88 | RShannonev  | 0.001 | 0.0002 | 0.0001 | 0.003 | 0.0025 | 0.0006 | 0.000 |
| en          | 6    |        |        | 0    |        |        |        | 0    | en          | 2     |        |        | 0     |        |        | 8     |
| RSimpsonnev | 0.70 | 0.827  | -0.869 | 0.64 | 0.645  | 0.837  | 0.493  | 0.69 | RSimpsonnev | 0.022 | 0.0031 | 0.0011 | 0.044 | 0.0442 | 0.0025 | 0.025 |
| en          | 7    |        |        | 3    |        |        |        | 6    | en          | 2     |        |        | 8     |        |        | 3     |
|             | -    |        |        | -    |        |        |        | -    |             |       |        |        |       |        |        |       |
| RPd         | 0.08 | -0.100 | 0.095  | 0.03 | -0.011 | -0.109 | -0.069 | 0.05 | RPd         | 0.816 | 0.7840 | 0.7933 | 0.929 | 0.9760 | 0.7639 | 0.885 |
|             | 4    |        |        | 2    |        |        |        | 2    |             | 6     |        |        | 3     |        |        | 5     |
| MSB         |      |        |        |      |        |        |        |      |             |       |        |        |       |        |        |       |
|             | -    |        |        | -    |        |        |        | -    |             |       |        |        |       |        |        |       |
| RSobs       | 0.34 | -0.224 | 0.085  | 0.38 | -0.397 | -0.172 | 0.105  | 0.38 | RSobs       | 0.323 | 0.534  | 0.816  | 0.276 | 0.257  | 0.636  | 0.270 |
|             | 9    |        |        | 2    |        |        |        | 7    |             |       |        |        |       |        |        |       |
|             | -    |        |        | -    |        |        |        | -    |             |       |        |        |       |        |        |       |
| RShannon    | 0.03 | 0.148  | -0.148 | 0.01 | -0.021 | 0.159  | 0.525  | 0.00 | RShannon    | 0.914 | 0.683  | 0.684  | 0.976 | 0.955  | 0.660  | 0.990 |
|             | 9    |        |        | 1    |        |        |        | 5    |             |       |        |        |       |        |        |       |
|             | -    |        |        | -    |        |        |        | -    |             |       |        |        |       |        |        |       |
| RSimpson    | 0.06 | -0.160 | 0.121  | 0.03 | 0.019  | -0.166 | -0.506 | 0.06 | RSimpson    | 0.864 | 0.659  | 0.739  | 0.929 | 0.959  | 0.646  | 0.858 |
|             | 2    |        |        | 2    |        |        |        | 5    |             |       |        |        |       |        |        |       |
|             | -    |        |        | -    |        |        |        | -    |             |       |        |        |       |        |        |       |
| RAce        | 0.27 | -0.069 | -0.059 | 0.25 | -0.201 | -0.016 | 0.192  | 0.30 | RAce        | 0.447 | 0.849  | 0.871  | 0.481 | 0.577  | 0.966  | 0.386 |
|             | 2    |        |        | 3    |        |        |        | 9    |             |       |        |        |       |        |        |       |
| RChao1      | -    | -0.157 | 0.009  | -    | -0.391 | -0.095 | 0.094  | -    | RChao1      | 0.313 | 0.664  | 0.981  | 0.268 | 0.264  | 0.794  | 0.339 |

|              |        |        |        |        |        |        |        |        |              |        |        |        |        |        |        |        |        |
|--------------|--------|--------|--------|--------|--------|--------|--------|--------|--------------|--------|--------|--------|--------|--------|--------|--------|--------|
|              | 0.356  |        |        | 0.388  |        |        |        | 0.338  |              |        |        |        |        |        |        |        |        |
| RShannoneven | 0.139  | 0.236  | -0.200 | 0.115  | 0.080  | 0.236  | 0.597  | 0.097  | RShannoneven | 0.701  | 0.511  | 0.580  | 0.752  | 0.827  | 0.511  | 0.068  | 0.789  |
| RSimpson     | 0.260  | 0.368  | -0.282 | 0.231  | 0.177  | 0.358  | 0.700  | 0.265  | RSimpson     | 0.469  | 0.296  | 0.430  | 0.521  | 0.626  | 0.310  | 0.024  | 0.459  |
| RPd          | -0.309 | -0.108 | -0.054 | -0.340 | -0.313 | -0.048 | 0.140  | -0.313 | RPd          | 0.384  | 0.767  | 0.883  | 0.337  | 0.379  | 0.896  | 0.699  | 0.379  |
| HSB          |        |        |        |        |        |        |        |        |              |        |        |        |        |        |        |        |        |
| RSobs        | 0.245  | 0.104  | -0.157 | 0.189  | 0.161  | 0.014  | -0.159 | 0.243  | RSobs        | 0.4958 | 0.7748 | 0.6651 | 0.6006 | 0.6573 | 0.9694 | 0.6603 | 0.4990 |
| RShannon     | 0.079  | -0.028 | -0.153 | 0.016  | -0.019 | -0.067 | -0.049 | 0.074  | RShannon     | 0.8289 | 0.9397 | 0.6727 | 0.9645 | 0.9580 | 0.8537 | 0.8926 | 0.8384 |
| RSimpson     | -0.010 | 0.164  | 0.019  | 0.042  | 0.092  | 0.222  | 0.223  | 0.010  | RSimpson     | 0.9776 | 0.6506 | 0.9586 | 0.9073 | 0.8013 | 0.5381 | 0.5360 | 0.9775 |
| RAce         | 0.245  | 0.085  | -0.120 | 0.190  | 0.161  | -0.016 | -0.218 | 0.247  | RAce         | 0.4945 | 0.8149 | 0.7403 | 0.5981 | 0.6570 | 0.9645 | 0.5452 | 0.4915 |
| RChao1       | 0.220  | 0.074  | -0.107 | 0.172  | 0.133  | -0.019 | -0.239 | 0.218  | RChao1       | 0.5406 | 0.8391 | 0.7687 | 0.6345 | 0.7142 | 0.9588 | 0.5064 | 0.5454 |
| RShannoneven | -0.015 | -0.095 | -0.141 | 0.077  | -0.115 | -0.105 | 0.010  | -0.019 | RShannoneven | 0.9665 | 0.7932 | 0.6973 | 0.8328 | 0.7526 | 0.7725 | 0.9771 | 0.9579 |
| RSimpson     | -0.095 | -0.239 | 0.012  | 0.150  | -0.200 | -0.266 | -0.167 | -0.098 | RSimpson     | 0.7949 | 0.5052 | 0.9747 | 0.6789 | 0.5792 | 0.4573 | 0.6454 | 0.7870 |
| RPd          | 0.108  | 0.025  | -0.200 | 0.055  | 0.013  | -0.014 | -0.073 | 0.083  | RPd          | 0.7661 | 0.9452 | 0.5802 | 0.8808 | 0.9715 | 0.9693 | 0.8408 | 0.8187 |

CON represents the control group, which received milk without sodium butyrate (SB) supplementation. LSB refers to the low SB supplementation group, MSB refers to the medium SB supplementation group, and HSB refers to the high SB supplementation group. Before the diversity index, R represents the ruminal outcome, while I represents the intestinal outcome. Data were considered significant at  $p < 0.05$  and  $n = 10$ .

(A)

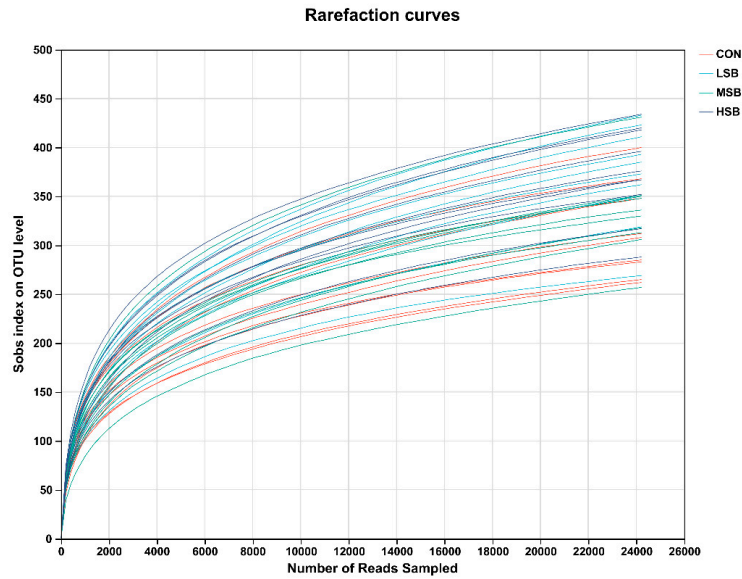

(B)

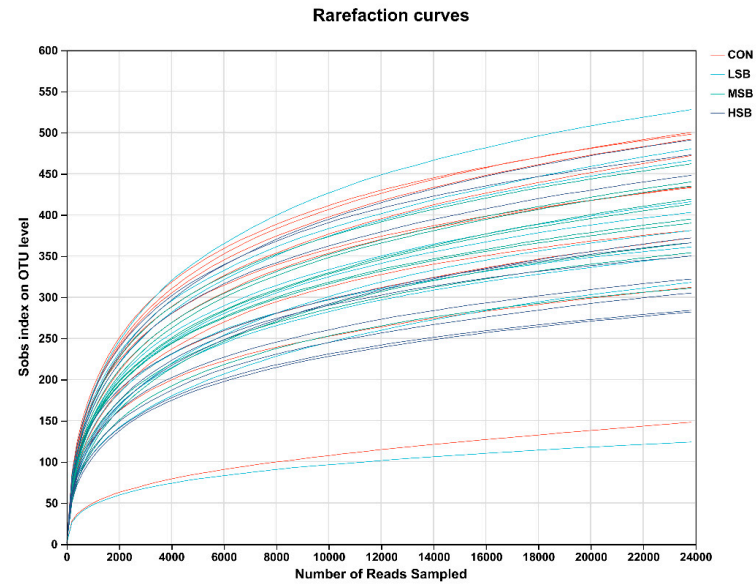

**Supplemental Figure S1.** Effects of sodium butyrate supplementation on rarefaction curves of ruminal and intestinal microbiota in preweaning calves. (A) The ruminal microbiota. (B) The intestinal microbiota CON represents the control group, which received milk without sodium butyrate (SB) supplementation. LSB refers to the low SB supplementation group, MSB refers to the medium SB supplementation group, and HSB refers to the high SB supplementation group.
